# Supplementary material
Source: PubMed Central journal article supplement (PMC5805028)
Supplement: tpmd161016.SD1.pdf [file tpmd161016.SD1.pdf]

SUPPLEMENTAL TABLE 1

Comparison of hepatitis B virus (HBV) parameters at initiation of antiretroviral therapy (ART) between randomization arms (in only patients with co-infection)

|                          | ART protocol arm    |                     |                  | P*  |
|--------------------------|---------------------|---------------------|------------------|-----|
|                          | Continuous (N = 10) | CD4-guided (N = 25) | 2/4-ART (N = 30) |     |
| HBV-DNA copies/mL†       | 8.05 (6.02–8.70)    | 7.21 (6.12–7.71)    | 7.27 (5.15–8.15) | 0.5 |
| HBV-DNA > 12 copies/mL‡  | 4 (40.0)            | 14 (56.0)           | 13 (43.3)        | 0.6 |
| HBeAg‡                   | 2 (20.0)            | 9 (36.0)            | 9 (30.0)         | 0.7 |
| ALT, IU/mL† [N = 51]     | 25 (21–30)          | 29 (20–51)          | 20 (19–34)       | 0.3 |
| AST, IU/mL†              | 24 (18–44)          | 26 (24–32)          | 27 (20–32)       | 0.7 |
| Elevated transaminases†§ | 3 (30.0)            | 5 (20.0)            | 4 (13.3)         | 0.5 |

ALT = alanine aminotransferase; AST = aspartate aminotransferase; HBeAg = hepatitis B “e” antigen.

\* Overall significance between groups determined using Kruskal-Wallis test for continuous variables and Pearson  $\chi^2$  test or Fisher’s exact test for categorical variables.

† Median (interquartile range).

‡ Number (%).

§ Defined as ALT or AST > 40 IU/mL.

SUPPLEMENTAL TABLE 2

Determinants of time from randomization to CD4<sup>+</sup> cell count levels < 200/mm<sup>3</sup>

|                                                   | Univariable       |         | Multivariable*    |         |
|---------------------------------------------------|-------------------|---------|-------------------|---------|
|                                                   | HR (95% CI)       | P       | HR (95% CI)       | P       |
| HBV-infection group                               |                   |         |                   |         |
| HBsAg–                                            | 1.00              |         |                   |         |
| HBsAg+/HBV-DNA ≤ 10 <sup>4</sup> copies/mL        | 0.58 (0.21–1.64)  | 0.3     |                   |         |
| HBsAg+/HBV-DNA > 10 <sup>4</sup> copies/mL        | 1.91 (1.09–3.36)  | 0.02    |                   |         |
| Age (per year)                                    | 0.99 (0.97–1.02)  | 0.6     |                   |         |
| Female gender                                     | 1.10 (0.74–1.64)  | 0.6     |                   |         |
| BMI (per kg/m <sup>2</sup> )                      | 0.92 (0.87–0.96)  | 0.001   | 0.94 (0.89–0.99)  | 0.04    |
| CD4 <sup>+</sup> cells (per 100/mm <sup>3</sup> ) | 0.36 (0.29–0.46)  | < 0.001 | 0.35 (0.28–0.44)  | < 0.001 |
| WHO clinical stage III/IV vs. I/II                | 1.26 (0.89–1.79)  | 0.19    |                   |         |
| AST (per 10 IU/mL)*                               | 1.06 (1.03–1.09)  | < 0.001 | 1.08 (1.05–1.10)  | < 0.001 |
| Randomization arm                                 |                   |         |                   |         |
| Continuous                                        | 1.00              |         | 1.00              |         |
| CD4-guided interruptions                          | 6.76 (3.15–14.50) | < 0.001 | 7.79 (3.61–16.82) | < 0.001 |
| Fixed interruptions                               | 2.84 (1.30–6.21)  | 0.009   | 3.45 (1.57–7.60)  | 0.002   |
| Cumulative LAM-duration                           | 0.97 (0.90–1.04)  | 0.4     |                   |         |

AST = aspartate aminotransferase; BMI = body mass index; HBV = hepatitis B virus; HBsAg = HR = hazards ratios; LAM = lamivudine; WHO = World Health Organization. All determinants are from the inclusion visit (with the exception of randomization arm), whereas cumulative LAM-duration was modeled as a time-varying covariate.

\* The following variables were not included in the multivariable model because their associated P value was no longer below the pre-specified threshold: HBV-infection group (overall P = 0.820) and WHO clinical stage (P = 0.930).
